# Supplementary material
Source: PubMed Central journal article supplement (PMC4624114)

## Supplementary Material for “The Effect of Membrane Lipid Composition Upon the Formation of Lipid Ultra-Nanodomains” by Pathak, P. and London, E.

### Estimating the Effect of Membrane Domain Formation Upon Donor Quenching

In the presence of an acceptor, the concentration dependence of donor quenching in a homogeneous bilayer can be approximated by (Chattopadhyay and London (1987) Biochemistry 26, 39-45):

$$(1) F/F_0 = \exp(-1.21\pi R_o^2 C_a)$$

Where  $C_a$  is the acceptor concentration in acceptors/area. This expression is strictly valid for a process with very close to an all-or-none distance dependence, and is a good approximation to FRET quenching of donor fluorescence by acceptor within a few percent (Chattopadhyay and London (1987) Biochemistry 26, 39-45). The donor fluorescence in a domain-containing membrane sample is the sum of the donor fluorescence in each domain. For a probe with fluorescence that is not dependent upon lipid phase, fluorescence will be given by:

$$(2) F/F_0 = \text{fr. D Ld} [\exp(-1.21\pi R_o^2 C_{a \text{ Ld}})] + \text{fr. D Lo} [\exp(-1.21\pi R_o^2 C_{a \text{ Lo}})]$$

Where fr. D Ld is the fraction of the donor in the Ld state, and fr. D Lo is the fraction of the donor in the Lo state,  $C_{\text{Ld}}$  is the concentration of the acceptor in the Ld domains, and  $C_{\text{Lo}}$  is the concentration of the acceptor in the Lo domains. The relationship between  $C_a$ ,  $C_{\text{Lo}}$  and  $C_{\text{Ld}}$  is:

$$(3) C_a = (\text{fr. Ld})(C_{a \text{ Ld}}) + (\text{fr. Lo})(C_{a \text{ Lo}})$$

Where fr. Ld and fr. Lo are the fractions of the bilayer in the Ld and Lo states, respectively. An analogous expression can be written for donor concentrations:

$$(4) C_d = (\text{fr. Ld})(C_{d \text{ Ld}}) + (\text{fr. Lo})(C_{d \text{ Lo}})$$

The partition coefficients between Lo and Ld domains for acceptor and donor, respectively, are defined as:

$$(5) Kp_a = C_{a \text{ Lo}} / C_{a \text{ Ld}}$$

$$(6) Kp_d = C_{d \text{ Lo}} / C_{d \text{ Ld}}$$

Combining equations (3) and (5), and using the relationship that fr. Ld + fr. Lo = 1 yields the equations:

$$(7) C_{a \text{ Ld}} = C_a / [\text{fr. Ld} + (1 - \text{fr. Ld})(Kp_a)]$$

$$(8) C_{a \text{ Lo}} = [(Kp_a)(C_a)] / [\text{fr. Ld} + (1 - \text{fr. Ld})(Kp_a)]$$

Similarly:

$$(9) C_{d Ld} = C_d / [fr.Ld+(1-fr. Ld)(Kp_d)]$$

$$(10) C_{d Lo} = [(Kp_d)(C_d)]/[fr.Ld+(1-fr. Ld)(Kp_d)]$$

The fraction of the donor in the Ld domains is given by:

$$(11) fr. D_{Ld} = [(C_{d Ld})(fr. Ld)]/ [(C_{d Ld})(fr. Ld)+ (C_{d Lo})(fr. Lo)]$$

Substitution of (9) and (10) into (11) gives:

$$(12) fr. D_{Ld} = fr. Ld/ [(fr. Ld)+ (Kp_d)(1-fr. Ld)]$$

And thus:

$$(13) fr. D_{Lo} = 1- fr. D_{Ld} = 1-[fr. Ld/ [(fr. Ld)+ (Kp_d)(1-fr. Ld)]]$$

Substituting (7),(8),(12), and (13) into equation (2) gives the final expression:

$$(14) F/Fo = (fr. Ld/ [(fr. Ld)+ (Kp_d)(1-fr. Ld)]) (\exp((-1.21\pi R_o^2 C_a) / [fr.Ld+(1-fr. Ld)(Kp_a)]) + (1-[fr. Ld/ [(fr. Ld)+ (Kp_d)(1-fr. Ld)]]) (\exp((-1.21\pi R_o^2) ([Kp_a)(C_a) / [fr.Ld+(1-fr. Ld)(Kp_a)])))$$

This gives the value of F/Fo as a function of the donor and acceptor partition coefficients, acceptor concentration, and the fraction of the bilayer in the Ld and Lo states.

**Supplementary Figure 1:** F/F<sub>0</sub> data showing sigmoidal curves fit to data for calculation of T<sub>mid</sub>. A. bSM/POPC/chol, B. bSM/DOPC/chol, C. DPPC/POPC/chol, D. DPPC/DOPC/chol. Samples contained (triangle) 38 mol% or (circle) 28mol% cholesterol. Samples also contained (open symbols) 0.05 mol% pyrene-DPPE or (filled symbols) 0.1 mol% NBD-DPPE, and when acceptor was present 2 mol% rhodamine-DOPE. The sigmoidal fits were calculating using the SlideWrite program (Advanced Graphics Software Inc., Rancho Santa Fe, CA). In samples with NBD-DPPE, bSM, and either POPC or 38% cholesterol curves are very incomplete, and fits were calculated assuming that F/F<sub>0</sub> reaches a limiting value of 0.5 at low temperature. In the case of bSM/DOPC/28mol% cholesterol this may have led to a slight underestimate of T<sub>mid</sub>.

**Supplementary Figure 2:** Calculated FRET vs. donor partition coefficients in domain-containing membranes in which acceptor partitions strongly into Ld domains shown at intermediate acceptor concentration and/or intermediate R<sub>o</sub> conditions. F/F<sub>0</sub> is shown for acceptor K<sub>p</sub> (L<sub>o</sub>/L<sub>d</sub>) values of 0.1 (circles) and 10 (plus symbols). Values chosen to approximate the behavior of the pyrene-DPPE, rhodamine-DOPE FRET pair in the experiments in this report (acceptor conc. 0.79/R<sub>o</sub><sup>2</sup>). F/F<sub>0</sub> values calculated for a bilayer that is 50% liquid ordered domains. F/F<sub>0</sub> values for homongeneous membranes lacking domains is shown by the dashed line.

**Supplementary Figure 3:** Calculated FRET vs. donor partition coefficients in domain-containing membranes in which acceptor partitions strongly into Ld domains shown at high acceptor concentration and/or large R<sub>o</sub> conditions at different fractions of the bilayer in ordered domains. F/F<sub>0</sub> is shown for acceptor K<sub>p</sub> (L<sub>o</sub>/L<sub>d</sub>) values of 0.1 and (plus symbols) 25%, (squares) 50%, or (diamonds) 75% of the bilayer in L<sub>o</sub> doamins. Values chosen to approximate the behavior of the NBD-DPPE, rhodamine-DOPE FRET pair in the experiments in this report (acceptor conc. 0.79/R<sub>o</sub><sup>2</sup>). F/F<sub>0</sub> values for homongeneous membranes lacking domains is shown by the dashed line.

Supplementary Figure 1:

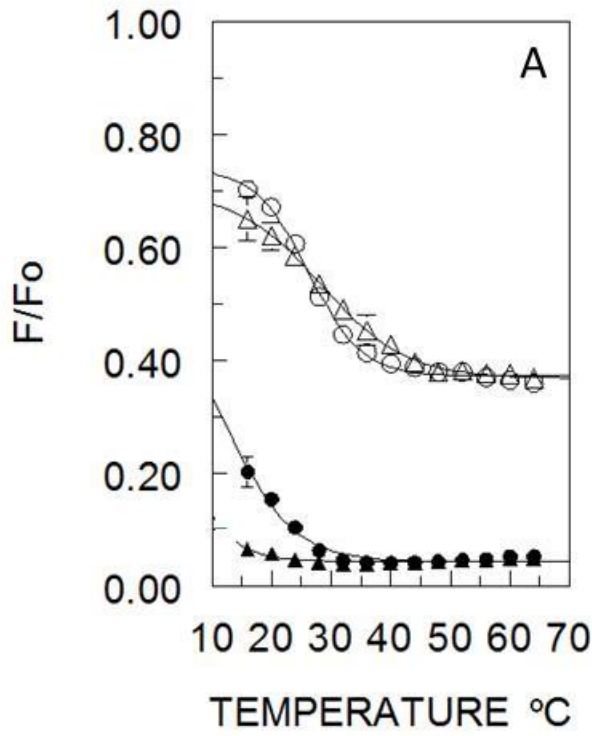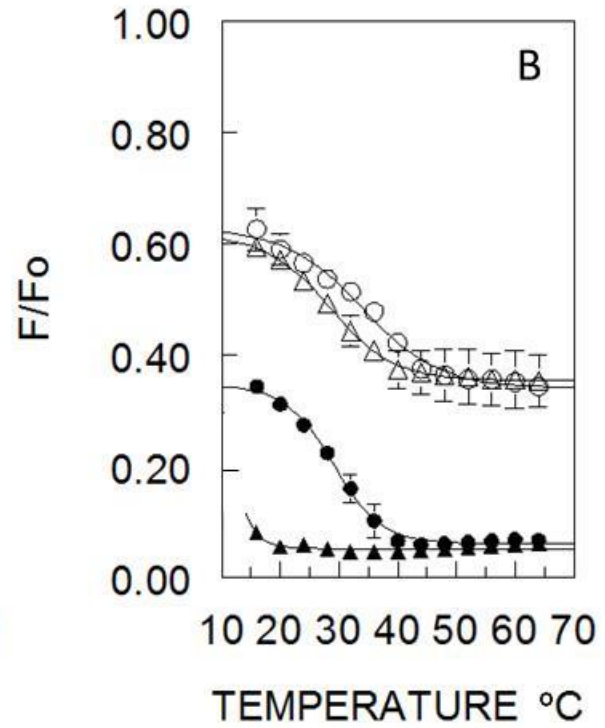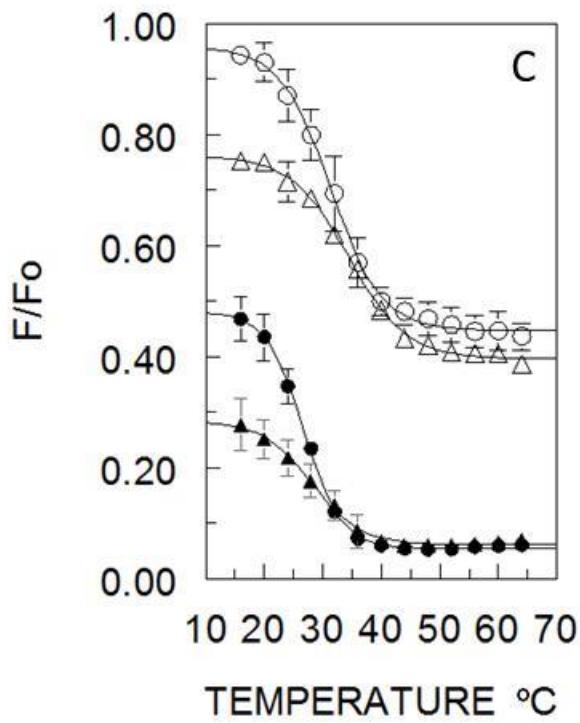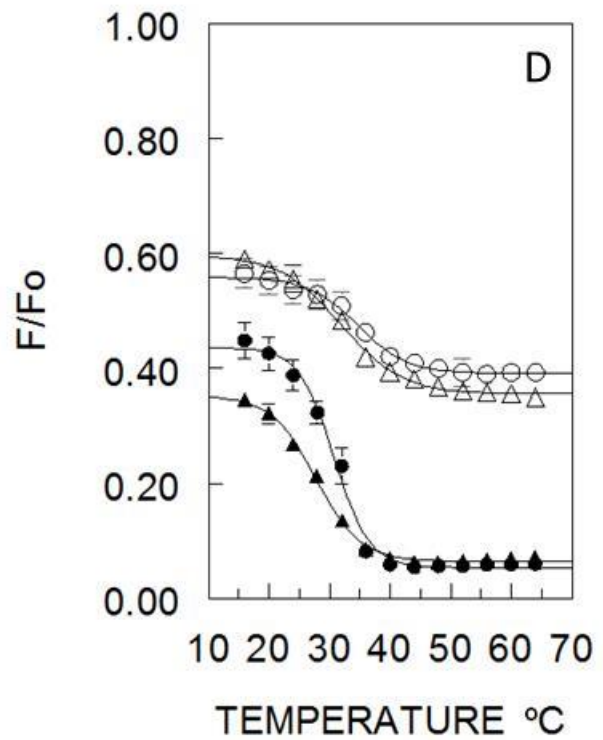

Supplementary Figure 2:

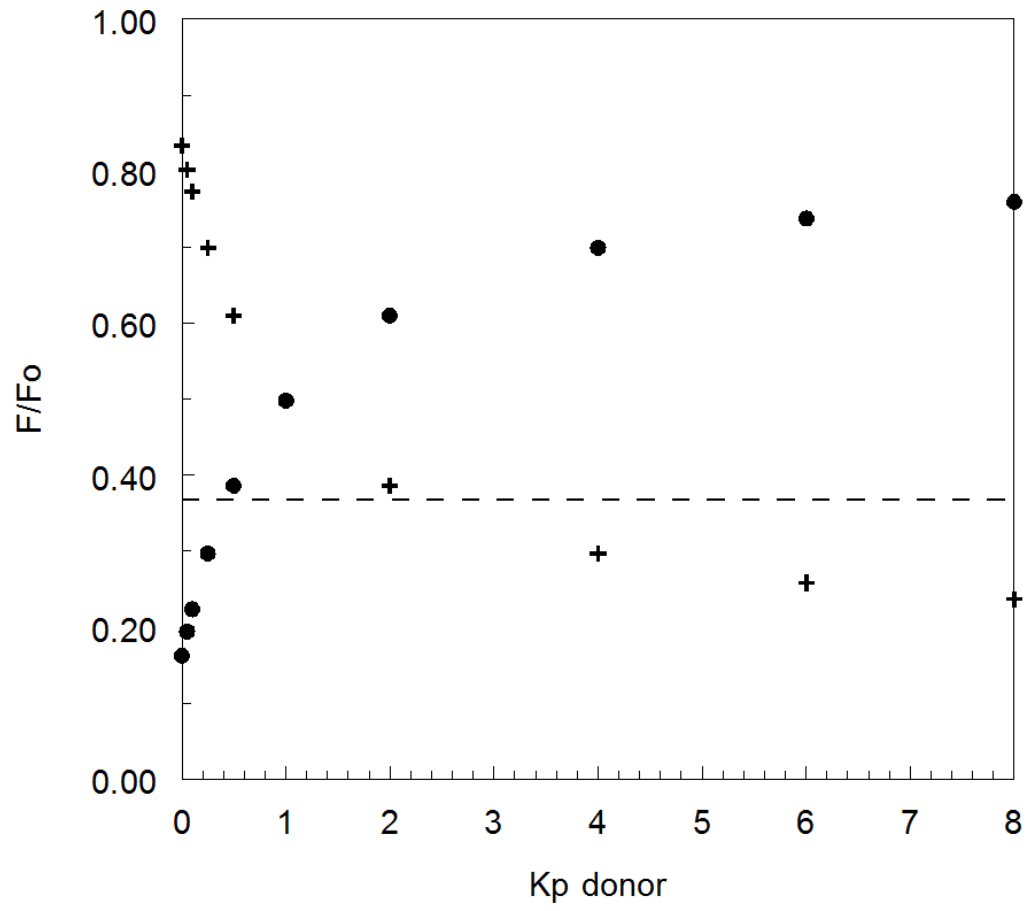

Supplementary Figure 3:

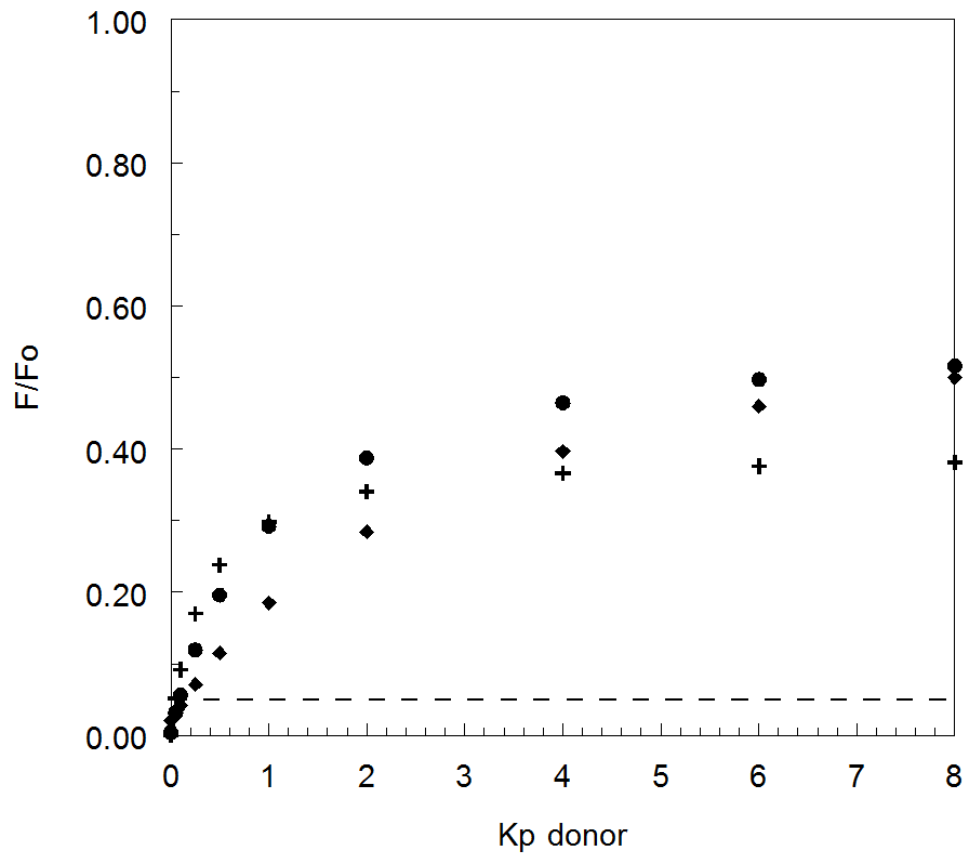

Supplement: mmc1.pdf [file mmc1.pdf]
